# Supplementary material
Source: HighWire-hosted journal article supplement (https://bmjopenquality.bmj.com/highwire/filestream/143795/field_highwire_adjunct_files/2/bmjoq-2022-001844supp003_data_supplement.pdf)
Supplement: bmjoq-2022-001844supp003_data_supplement.pdf [file bmjoq-2022-001844supp003_data_supplement.pdf]

### Factors which Support Interdisciplinary Care

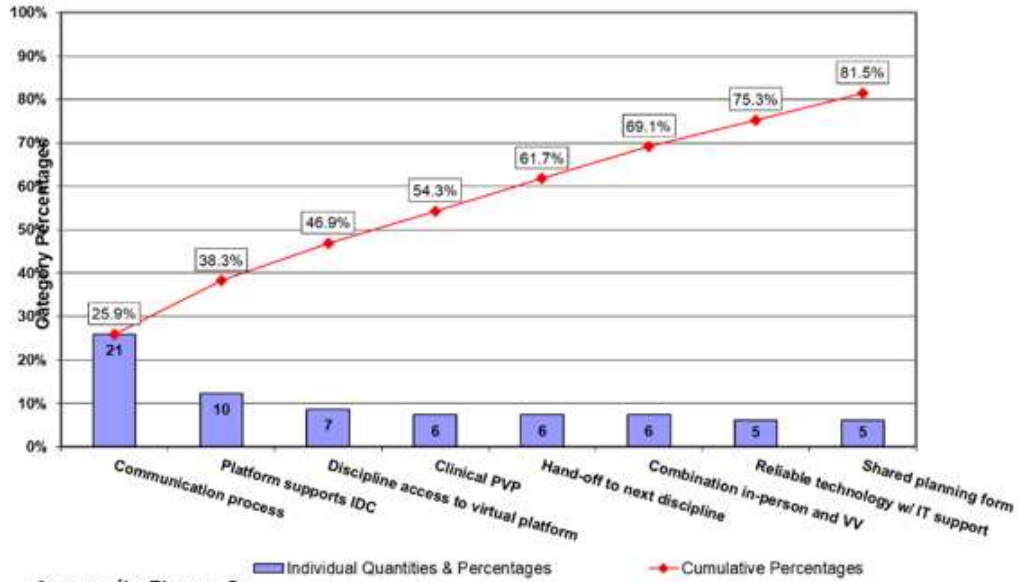

Appendix Figure 2a.

### Factors which Support Agenda Setting

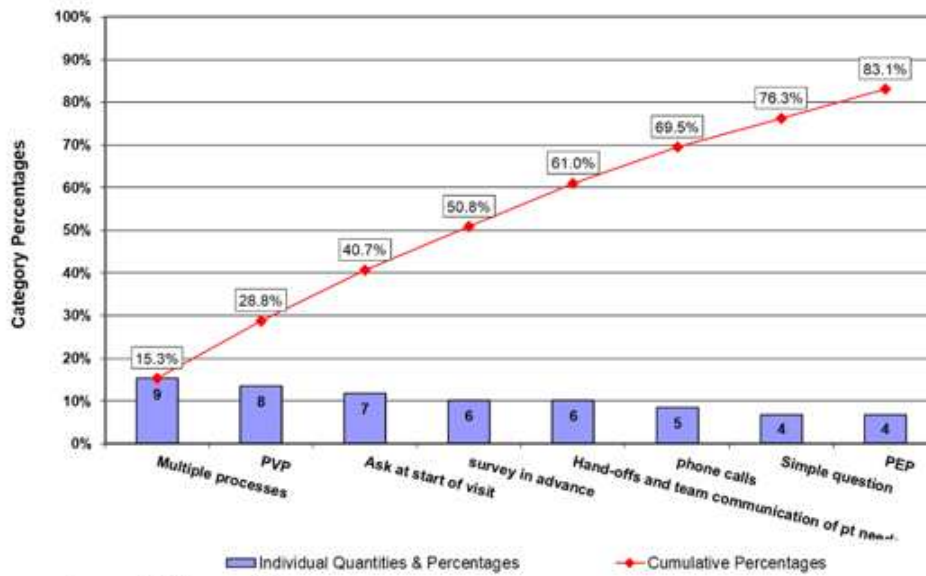

Appendix Figure 2b.
